# Supplementary figures and images for: A microfluidic-based genetic screen to identify microbial virulence factors that inhibit dendritic cell migration
Source: Royal Society of Chemistry journal article supplement (doi:10.1039/c3ib40177d), 2014-01-01

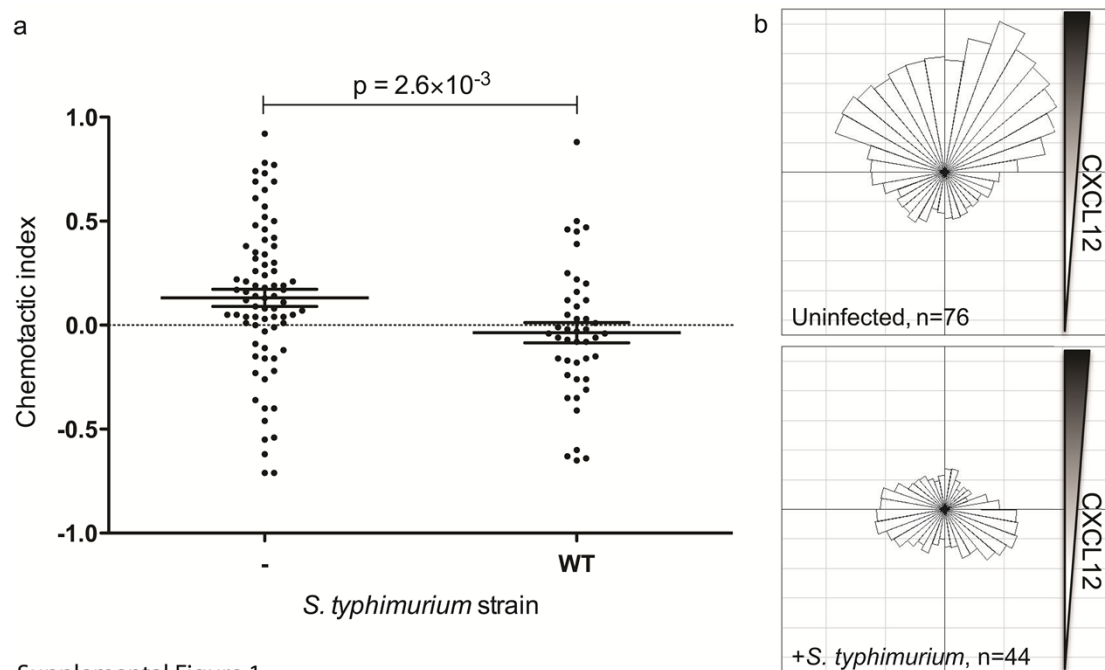

Supplemental Figure 1

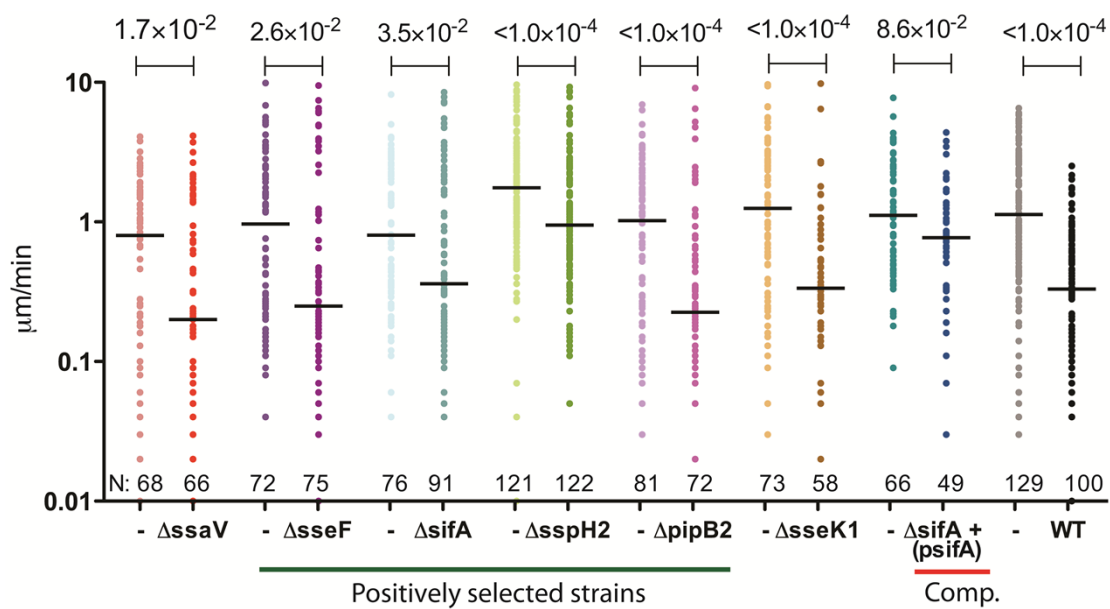

Supplemental Figure 2

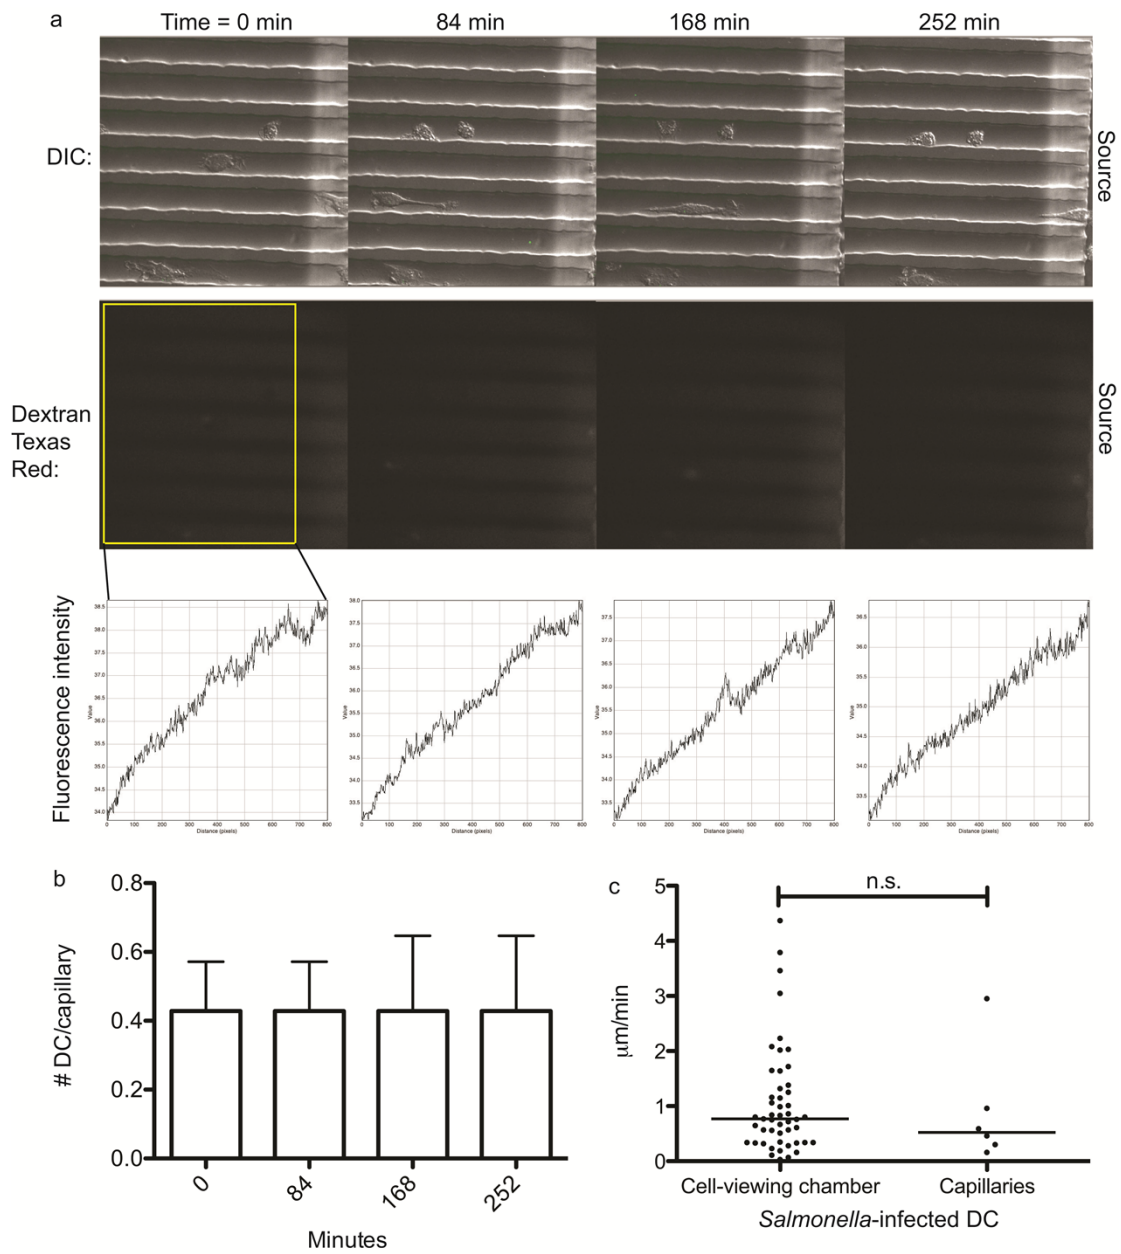

Supplemental Figure 3

Supplement: c3ib40177d1.pdf [file c3ib40177d1.pdf]
